# Supplementary material
Source: MDPI journal article supplement (https://www.mdpi.com/1424-2818/15/3/316)

**Table S1.** List of all treatments, strains and variables studied in this report. \* Only tested for *Halothece* sp. and *Cobetia* sp.

| (I, II) Without the infusion of CO <sub>2</sub>                                                                                                               |                                                                                                                           |                                                            |                                                            |                                                                        |                                                                        |                                                             |                                                                                                              |
|---------------------------------------------------------------------------------------------------------------------------------------------------------------|---------------------------------------------------------------------------------------------------------------------------|------------------------------------------------------------|------------------------------------------------------------|------------------------------------------------------------------------|------------------------------------------------------------------------|-------------------------------------------------------------|--------------------------------------------------------------------------------------------------------------|
| Strains                                                                                                                                                       | (I) pH experiment (at 24° C)                                                                                              |                                                            |                                                            | (II) Temperature experiment (adjusted to pH 8)                         |                                                                        |                                                             | Description                                                                                                  |
| <i>Halothece</i> sp. PCC 7418, Pasteur Culture Collection                                                                                                     | pH 4                                                                                                                      |                                                            |                                                            | 12 °C                                                                  |                                                                        |                                                             | Under nutrient-replete condition: 1.5 mM PO <sub>4</sub> <sup>3-</sup> , 1 μM Fe and 0.15 mM NH <sub>3</sub> |
| <i>Fischerella muscicola</i> PCC 73103, Pasteur Culture Collection                                                                                            | pH 5                                                                                                                      |                                                            |                                                            | 18 °C                                                                  |                                                                        |                                                             |                                                                                                              |
| <i>Cobetia</i> sp. UIB 001, obtained: isolated directly from <i>P. oceanica</i> roots (Fernández-Juárez et al., unpublished data). GenBank: CP058244-CP058245 | pH 6                                                                                                                      |                                                            |                                                            | 24 °C                                                                  |                                                                        |                                                             | Under nutrient limitation.: 0.1 μM PO <sub>4</sub> <sup>3-</sup> , 2 nM Fe and 0.15 mM NH <sub>3</sub>       |
|                                                                                                                                                               | pH 6.5*                                                                                                                   | pH 7*                                                      |                                                            | 30 °C                                                                  |                                                                        |                                                             |                                                                                                              |
|                                                                                                                                                               | <i>Pseudomonas azotifigens</i> DSM 17556 <sup>T</sup> , German Collection of Microorganisms and Cell Cultures GmbH (DSMZ) | pH 7.5*                                                    | pH 8*                                                      |                                                                        |                                                                        |                                                             |                                                                                                              |
| (III) With the infusion of CO <sub>2</sub> (410 and 1000 ppm)                                                                                                 |                                                                                                                           |                                                            |                                                            |                                                                        |                                                                        |                                                             |                                                                                                              |
| Strains                                                                                                                                                       | (i) CO <sub>2</sub> -Fe (at 24°C, adjusted to pH 8)                                                                       |                                                            |                                                            | (ii) CO <sub>2</sub> -temperature (adjusted to pH 8)                   |                                                                        |                                                             | Description                                                                                                  |
| <i>Halothece</i> sp. PCC 7418                                                                                                                                 | (+) Fe, 1 μM<br>(+) PO <sub>4</sub> <sup>3-</sup> , 1.5 mM                                                                | (-) Fe, 2 nM<br>(+) PO <sub>4</sub> <sup>3-</sup> , 1.5 mM | (± or -) Fe,<br>(-) PO <sub>4</sub> <sup>3-</sup> , 0.1 μM | 18 °C<br>(+) Fe, 1000 nM<br>(+) PO <sub>4</sub> <sup>3-</sup> , 1.5 mM | 30 °C<br>(+) Fe, 1000 nM<br>(+) PO <sub>4</sub> <sup>3-</sup> , 1.5 mM | 18 °C or 30°C<br>(-) PO <sub>4</sub> <sup>3-</sup> , 0.1 μM | Control, no CO <sub>2</sub> influx:                                                                          |
|                                                                                                                                                               |                                                                                                                           |                                                            |                                                            |                                                                        |                                                                        |                                                             | aCO <sub>2</sub> : 410 ppm                                                                                   |
|                                                                                                                                                               |                                                                                                                           |                                                            |                                                            |                                                                        |                                                                        |                                                             | eCO <sub>2</sub> : 1000 ppm                                                                                  |
|                                                                                                                                                               |                                                                                                                           |                                                            |                                                            |                                                                        |                                                                        |                                                             | At 120 r.p.m 12 h dark:12 h light photoperiod for 72 h, performed under 0.15 mM NH <sub>3</sub> )            |
| <i>Cobetia</i> sp. UIB 001                                                                                                                                    |                                                                                                                           |                                                            |                                                            |                                                                        |                                                                        |                                                             |                                                                                                              |
| Response variables                                                                                                                                            |                                                                                                                           |                                                            |                                                            |                                                                        |                                                                        |                                                             |                                                                                                              |
| (1) Growth                                                                                                                                                    |                                                                                                                           | (2) N <sub>2</sub> -fixation rates                         |                                                            | (3) P-mechanisms (APA)*                                                |                                                                        | (4) Oxidative stress (ROS)                                  |                                                                                                              |

**Figure S1.** Experimental set-up of the CO<sub>2</sub> experiments, considering two different levels of CO<sub>2</sub>, aCO<sub>2</sub>: 410 ppm and elevated, eCO<sub>2</sub>: 1000 ppm, and included a control with no CO<sub>2</sub> influx. The pH level was monitored for aCO<sub>2</sub> and eCO<sub>2</sub>.

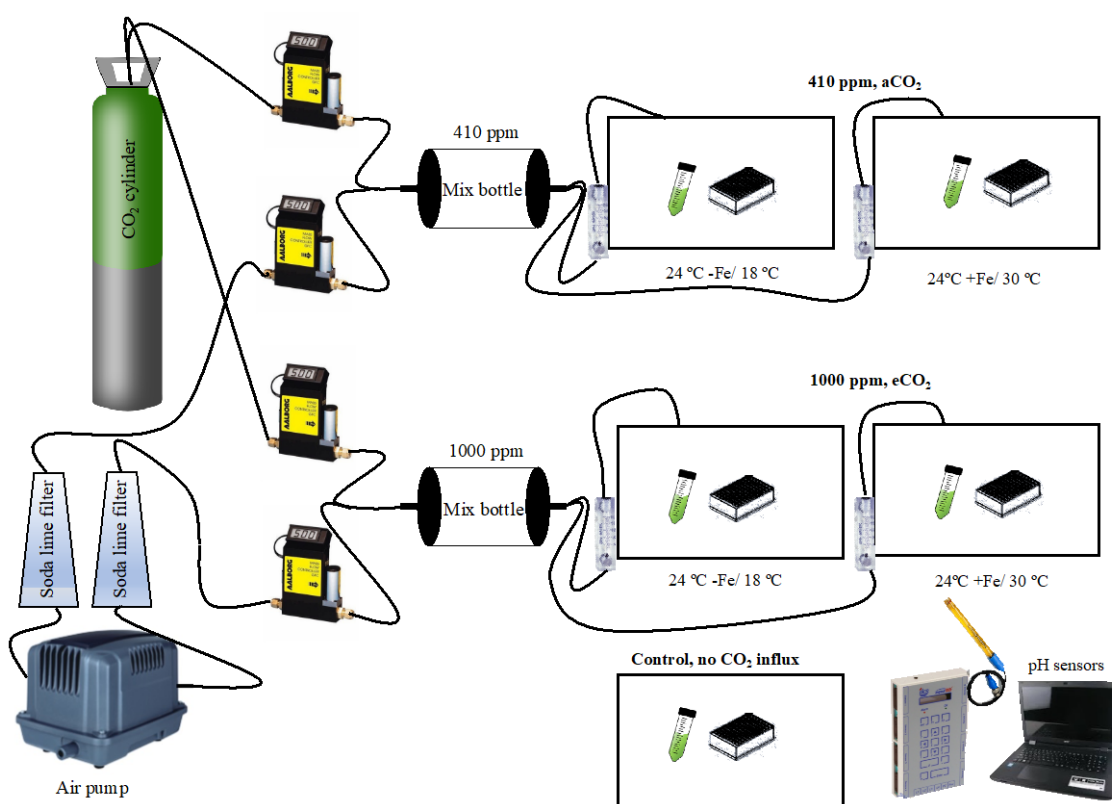

**Figure S2.** pH monitoring under a continuous influx of atmospheric CO<sub>2</sub> 410 ppm (atmospheric CO<sub>2</sub>, aCO<sub>2</sub>) and elevated CO<sub>2</sub> 1000 ppm (elevated CO<sub>2</sub>, eCO<sub>2</sub>) for *Halothece* sp. and *Cobetia* sp.

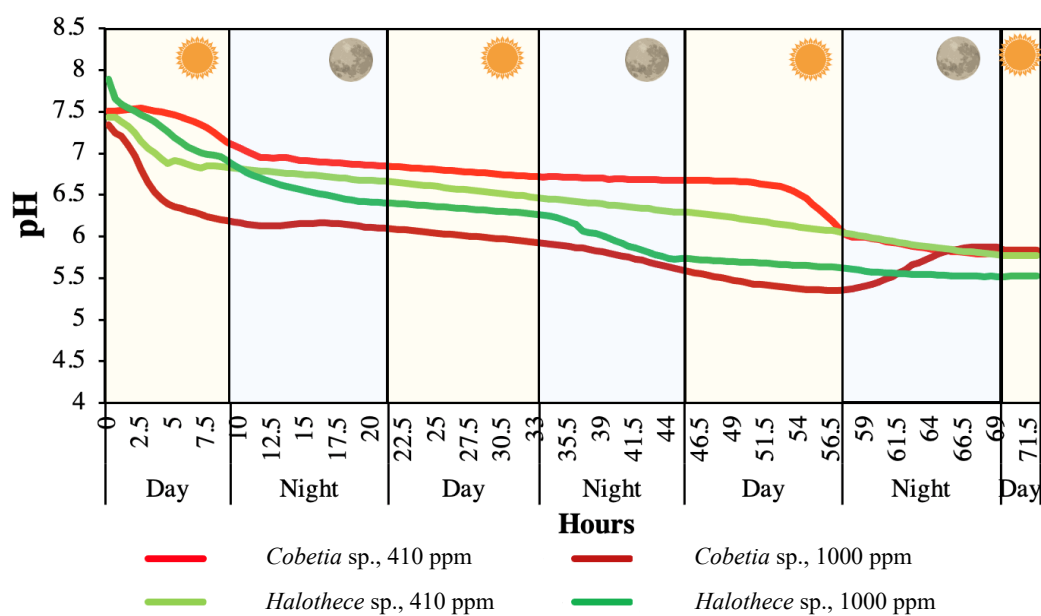

Supplement: s1 [file s1]
